# Supplementary material
Source: publisher figshare collection journal article supplement (https://acs.figshare.com/ndownloader/files/5928846)
Supplement: Supplementary file 1 [file 5928846]

## Supporting Information

### **Construction of a Hierarchical NiCo<sub>2</sub>S<sub>4</sub>@PPy Core-Shell Heterostructure Nanotube Array on Ni Foam for a High-Performance Asymmetric Supercapacitor**

Minglei Yan,<sup>†</sup> Yadong Yao,<sup>\*,†</sup> Jiqui Wen,<sup>‡</sup> Lu Long,<sup>†</sup> Menglai Kong,<sup>†</sup> Guanggao Zhang,<sup>†</sup> Xiaoming Liao,<sup>†</sup> Guangfu Yin,<sup>†</sup> and Zhongbing Huang<sup>†</sup>

<sup>†</sup>College of Materials Science and Engineering and <sup>‡</sup>Analytical and Test Center, Sichuan University, Chengdu 610065, china

\*Corresponding Author, E-mail: yaoyd523@163.com Tel./fax: +86 28 85413003.

## Calculation formulas:

### (1) Single electrode

The area specific capacitances of the samples are calculated from the CV curves using the following formula <sup>1</sup>:

$$C_s = \frac{1}{sv(V_a - V_c)} \int_{V_a}^{V_c} I(V) dV \quad (\text{Formula S1})$$

Where the  $C_s$  (F/cm<sup>2</sup>) is the area specific capacitance,  $I$  is the response current (A),  $s$  is the area of activate materials loaded on the Ni foam,  $v$  is the rate (mV/s) and  $V_c$  and  $V_a$  are the high and low potential limits of the CV tests.

The area and mass specific capacitances of the samples are calculated from the GCD curves using the following formula <sup>2</sup>:

$$C_s = \frac{I \times \Delta t}{s \times \Delta V} \quad (\text{Formula S2})$$

$$C_m = \frac{I \times \Delta t}{m \times \Delta V} \quad (\text{Formula S3})$$

Where the  $C_s$  (F/cm<sup>2</sup>) is the area specific capacitance, the  $C_m$  (F/g) is the mass specific capacitance,  $I$  is the response current (A),  $s$  is the area of activate materials loaded on the Ni foam,  $m$  is the mass of activate materials loaded on the Ni foam,  $\Delta t$  is the discharge time,  $\Delta V$  is potential window of the discharge process.

### (2) Supercapacitor device

The area and mass specific capacitances of the supercapacitor device calculated from the GCD curves is similar to those of single electrode.

The mass loading of activated carbon was determined by balancing the charges stored in each electrode. Its specific mass was calculated by the following formula <sup>3</sup>:

$$C_{s+}\Delta V_+S= C_{m-}\Delta V_-m. \quad (\text{Formula S4})$$

Where m is the mass loading,  $C_{s+}$  and  $C_{m-}$  represent the specific capacitance of positive electrode ( $\text{F}/\text{cm}^2$ ) and negative electrode ( $\text{F}/\text{g}$ ) respectively.  $\Delta V$  is the potential window of positive (+) and negative (-) electrode. S is the area of Ni foam supported  $\text{NiCo}_2\text{S}_4@\text{PPy}$ -50. m. is the mass of negative electrode.

The energy density (E) and power density (P) are obtained according to the following formulas <sup>4</sup>:

$$E = \frac{1}{2}C\Delta V^2 \quad (\text{Formula S5})$$

$$P = \frac{E}{\Delta t} \quad (\text{Formula S6})$$

Where E (Wh/kg) is the energy density, C (F/g) is the mass specific capacitance,  $\Delta V$  (V) is the voltage window, P (W/kg) refers to the power density and  $\Delta t$  (s) is the discharge time.

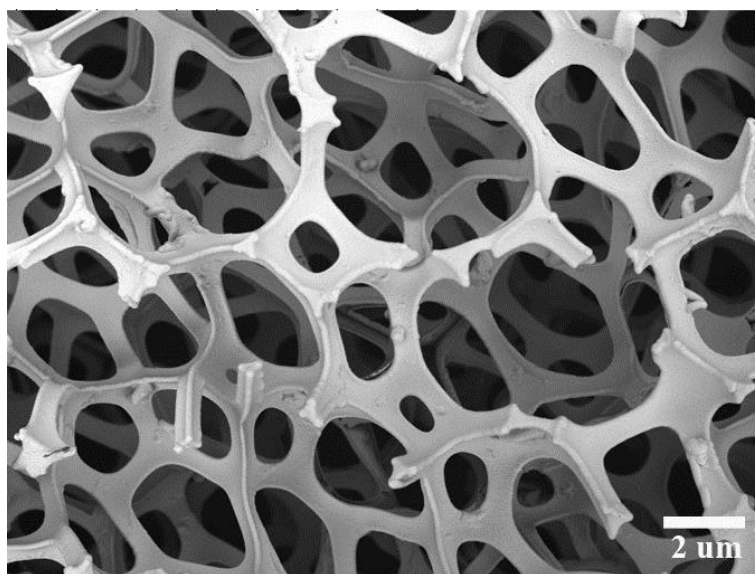

**Figure S1** SEM image of Ni foam.

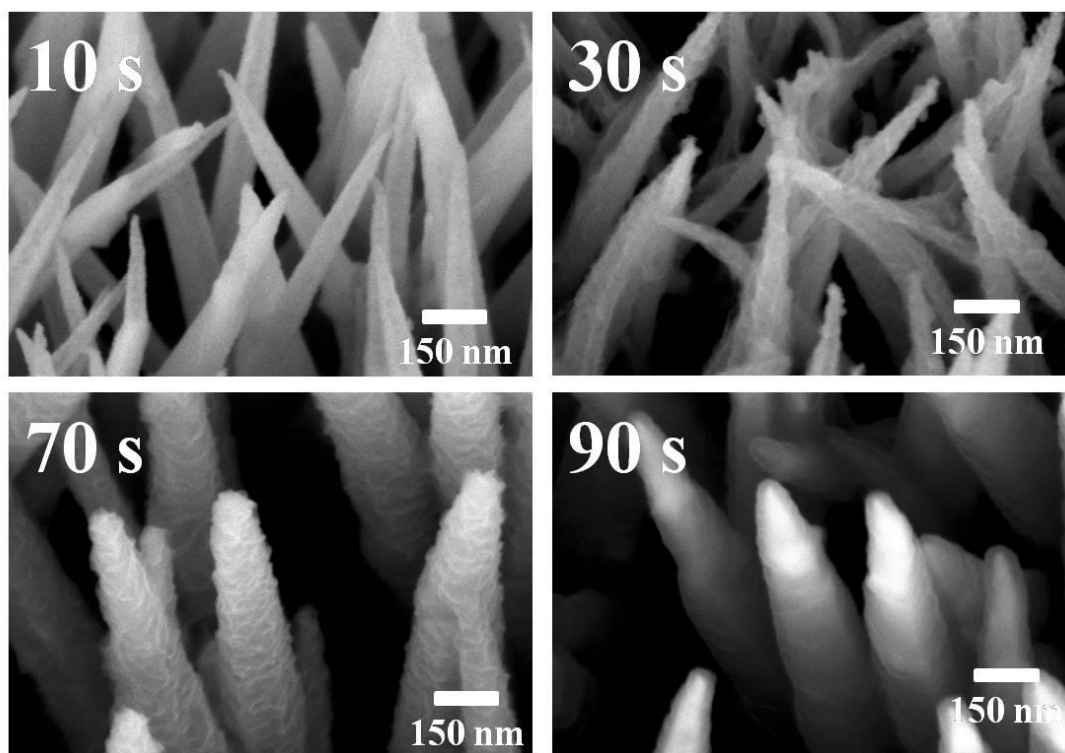

**Figure S2** SEM images of NiCo<sub>2</sub>S<sub>4</sub>@PPy NTA/NF by using different electrodeposition time.

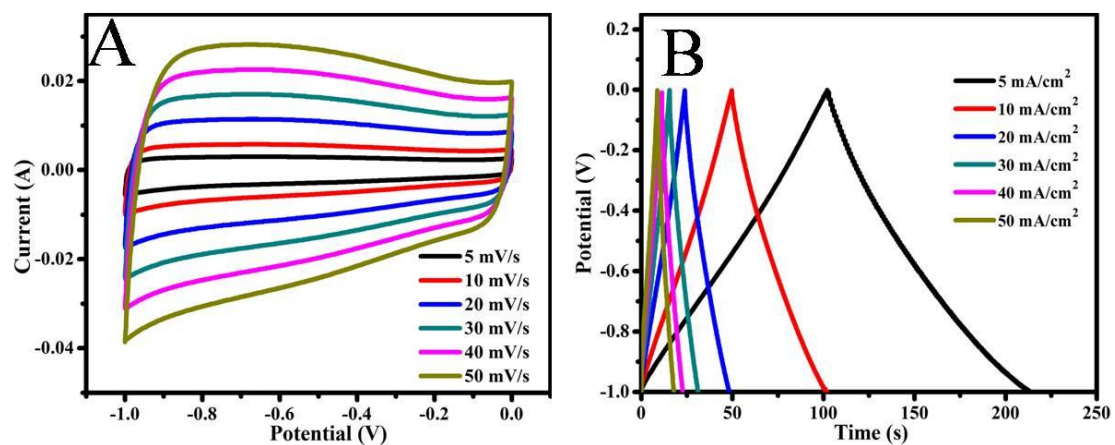

**Figure S3** (A) CV curves of the AC at different scan rates; (B) GCD curves of the AC at different current densities.

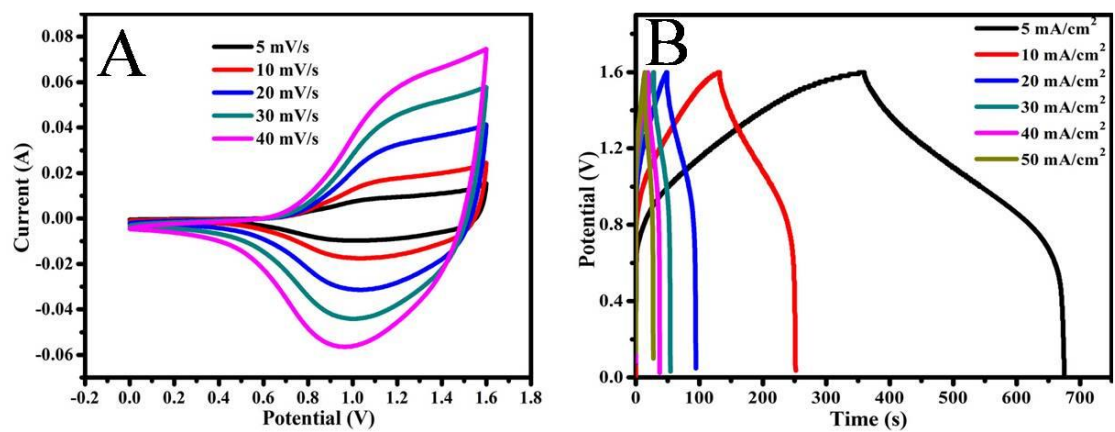

**Figure S4** (A) CV curves of NiCo<sub>2</sub>S<sub>4</sub>//AC at different scan rates; (B) GCD curves of NiCo<sub>2</sub>S<sub>4</sub>//AC at different current densities.

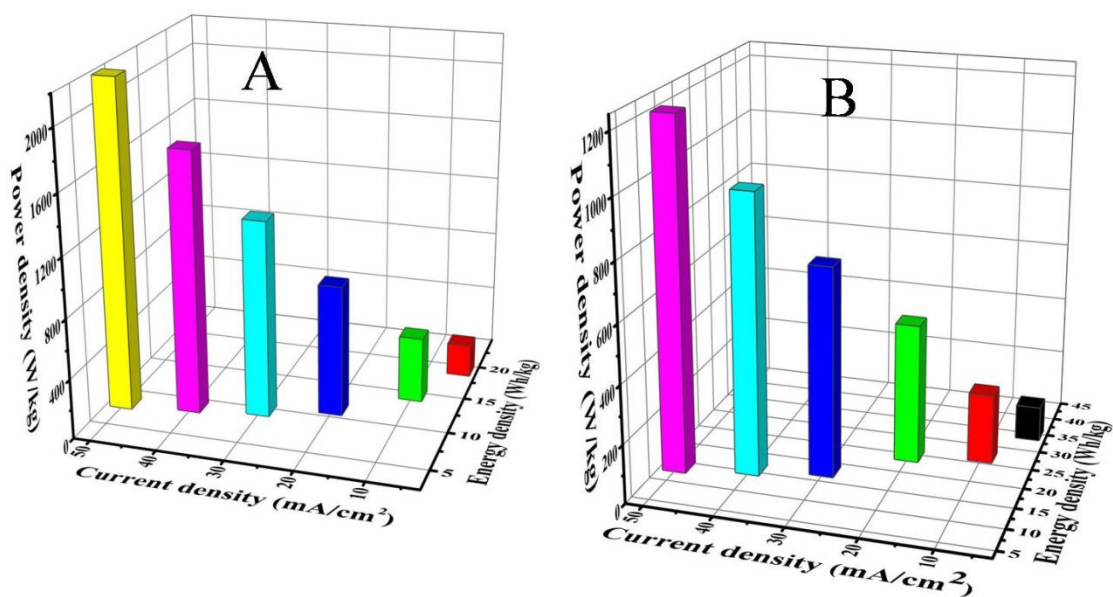

**Figure S5** (A) the energy density and power density of NiCo<sub>2</sub>S<sub>4</sub>//AC at different current densities; (B) the energy density and power density of NiCo<sub>2</sub>S<sub>4</sub>@PPy-50//AC at different current densities.



**Table S1 Comparison of synthesis method, morphology and electrochemical performance of different electrode materials**

| Electrode material                                                  | Method                             | Morphology                 | Specific capacitance                            | Capacitance retention                            | Ref.          |
|---------------------------------------------------------------------|------------------------------------|----------------------------|-------------------------------------------------|--------------------------------------------------|---------------|
| Carbon@ NiCo <sub>2</sub> S <sub>4</sub>                            | hydrothermal                       | nanorods                   | 1455 F/g at 1 A/g                               | 83% after 2000 cycles at 20 A/g                  | <sup>5</sup>  |
| NiCo <sub>2</sub> S <sub>4</sub> @ NiCo <sub>x</sub> S <sub>y</sub> | hydrothermal and electrodeposition | core-shell nanotube arrays | 3.9 F/cm <sup>2</sup> at 1 mA/cm <sup>2</sup>   | 77% after 1500 cycles at 10 mA/cm <sup>2</sup>   | <sup>6</sup>  |
| NiCo <sub>2</sub> S <sub>4</sub> @CoS <sub>x</sub>                  | hydrothermal                       | core-shell nanotube arrays | 4.74 F/cm <sup>2</sup> at 5 mA/cm <sup>2</sup>  | 76.1% after 1500 cycles at 50 mA/cm <sup>2</sup> | <sup>7</sup>  |
| NiCo <sub>2</sub> S <sub>4</sub> /CFC                               | solvothermal                       | Burl-like                  | 0.83 F/cm <sup>2</sup> at 25 mA/cm <sup>2</sup> | 75.9% after 5000 cycles at 20 mA/cm <sup>2</sup> | <sup>8</sup>  |
| CoS @ NiCo <sub>2</sub> S <sub>4</sub>                              | ion exchange process               | core-shell nanoarrays      | 7.62 F/cm <sup>2</sup> at 5 mA/cm <sup>2</sup>  | 71.7% after 3000 cycles at 10 mA/cm <sup>2</sup> | <sup>9</sup>  |
| NiCo <sub>2</sub> S <sub>4</sub> @MnO <sub>2</sub>                  | hydrothermal                       | core-shell nanotubes       | 1337.8 F/g at 2 A/g                             | 82% after 2000 cycles at 20 A/g                  | <sup>10</sup> |
| CoNi <sub>2</sub> S <sub>4</sub>                                    | hydrothermal                       | mushroom-like              | 5.71 F/cm <sup>2</sup> at 20 mA/cm <sup>2</sup> | 80.91% after 3000 cycles at                      | <sup>11</sup> |

---

|                                          |                       |                |                         |                       |                       |               |
|------------------------------------------|-----------------------|----------------|-------------------------|-----------------------|-----------------------|---------------|
|                                          |                       |                |                         |                       | 20 mA/cm <sup>2</sup> |               |
| NiCo <sub>2</sub> S <sub>4</sub> /MWCNTs | solvothermal reaction | nanotubes      | 2080 F/g at 1           | 83% after 2000        |                       | <sup>12</sup> |
|                                          |                       |                | A/g                     | cycles at 8 A/g       |                       |               |
| NiCo <sub>2</sub> S <sub>4</sub> @PPy    | hydrothermal          | and core-shell | 9.781 F/cm <sup>2</sup> | 72.19% after          | This                  |               |
|                                          | electrodeposition     | nanotube       | (1364 F/g) at           | 3000 cycles at        | work                  |               |
|                                          |                       | arrays         | 5 mA/cm <sup>2</sup>    | 50 mA/cm <sup>2</sup> |                       |               |

---

## Reference

- (1) Mei, L.; Yang, T.; Xu, C.; Zhang, M.; Chen, L.; Li, Q.; Wang, T. Hierarchical Mushroom-Like  $\text{CoNi}_2\text{S}_4$  Arrays as a Novel Electrode Material for Supercapacitors. *Nano Energy* **2014**, *3*, 36-45.
- (2) Li, R.; Wang, S.; Huang, Z.; Lu, F.; He, T.  $\text{NiCo}_2\text{S}_4@\text{Co}(\text{OH})_2$  Core-Shell Nanotube Arrays in Situ Grown on Ni Foam for High Performances Asymmetric Supercapacitors. *J. Power. Sources* **2016**, *312*, 156-164.
- (3) Chen, H.; Jiang, J.; Zhang, L.; Xia, D.; Zhao, Y.; Guo, D.; Qi, T.; Wan, H. In Situ Growth of  $\text{NiCo}_2\text{S}_4$  Nanotube Arrays on Ni Foam for Supercapacitors: Maximizing Utilization Efficiency at High Mass Loading to Achieve Ultrahigh Areal Pseudocapacitance. *J. Power. Sources* **2014**, *254*, 249-257.
- (4) Kong, W.; Lu, C.; Zhang, W.; Pu, J.; Wang, Z. Homogeneous Core-Shell  $\text{NiCo}_2\text{S}_4$  Nanostructures Supported on Nickel Foam for Supercapacitors. *J. Mater. Chem. A* **2015**, *3*, 12452-12460.
- (5) Li, L.; Dai, Z.; Zhang, Y.; Yang, J.; Huang, W.; Dong, X. Carbon@ $\text{NiCo}_2\text{S}_4$  Nanorods: An Excellent Electrode Material for Supercapacitors. *RSC Adv.* **2015**, *5*, 83408-83414.
- (6) Ding, R.; Zhang, M.; Yao, Y.; Gao, H. Crystalline  $\text{NiCo}_2\text{S}_4$  Nanotube Array Coated with Amorphous  $\text{NiCo}_2\text{S}_4$  for Supercapacitor Electrodes. *J. Colloid. Interface. Sci.* **2016**, *467*, 140-147.
- (7) Fu, W. Cobalt Sulfide Nanosheets Coated on  $\text{NiCo}_2\text{S}_4$  Nanotube Arrays as Electrode Materials for High-Performance Supercapacitors. *J. Mater. Chem. A* **2015**, *3*, 10492-10497.

- (8) Sun, M.; Tie, J.; Cheng, G.; Lin, T.; Peng, S.; Deng, F.; Ye, F.; Yu, L. In Situ Growth of Burl-Like Nickel Cobalt Sulfide on Carbon Fibers as High-Performance Supercapacitors. *J. Mater. Chem. A* **2014**, *3*, 1730-1736.
- (9) Zeng, W.; Zhang, G.; Wu, X.; Zhang, K.; Zhang, H.; Hou, S.; Li, C.; Wang, T.; Duan, H. Construction of Hierarchical CoS Nanowire@ NiCo<sub>2</sub>S<sub>4</sub> Nanosheet Arrays Via One-Step Ion Exchange for High-Performance Supercapacitors. *J. Mater. Chem. A* **2015**, *3*.
- (10) Yang, J. Hybrid NiCo<sub>2</sub>S<sub>4</sub>@MnO<sub>2</sub> Heterostructures for High-Performance Supercapacitor Electrodes. *J. Mater. Chem. A* **2014**, *3*, 1258-1264.
- (11) Mei, L.; Yang, T.; Xu, C.; Zhang, M.; Chen, L.; Li, Q.; Wang, T. Hierarchical Mushroom-Like CoNi<sub>2</sub>S<sub>4</sub> Arrays as a Novel Electrode Material for Supercapacitors. *Nano Energy* **2014**, *3*, 36-45.
- (12) Wen, P.; Fan, M.; Yang, D.; Wang, Y.; Cheng, H.; Wang, J. An Asymmetric Supercapacitor with Ultrahigh Energy Density Based on Nickel Cobalt Sulfide Nanocluster Anchoring Multi-Wall Carbon Nanotubes Hybrid. *J. Power. Sources* **2016**, *320*, 28-36.
